# Supplementary material for: Prestige bias drives the viral spread of content reposted by influencers in online communities
Source: Research Square preprint supplement (doi:10.21203/rs.3.rs-5620691/v1), 2025-03-31
Supplement: Supplementary file [file 41b772816a83dcdbb7669a1b.pdf]

# Supplementary Materials: Prestige bias drives the viral spread of content reposted by influencers in online communities

Takuro Niitsuma\*<sup>1</sup>, Mitsuo Yoshida<sup>2</sup>, Hideaki Tamori<sup>1</sup>, and Yo Nakawake\*<sup>3</sup>

<sup>1</sup>Media R&D Center, The Asahi Shimbun Company, 5-3-2 Tsukiji, Chuo-ku, Tokyo, Japan

<sup>2</sup>Institute of Business Sciences, University of Tsukuba, 3-29-1 Otsuka, Bunkyo-ku, Tokyo, Japan

<sup>3</sup>Graduate School of Advanced Science and Technology, Japan Advanced Institute of Science and Technology, 1-1 Asahidai, Nomi, Ishikawa, 923-1211, Japan

## 1 S1 Detail of English Dataset

2 In addition to our main dataset analyzed in this study, we also examined an  
3 English-language dataset to check the robustness of our findings. Specifically,  
4 we used a set of one million users (sampled in December 2014 from the global  
5 timeline) provided by Yamaguchi et al. [3] and collected all reposts over 24 hours  
6 on January 1, 2015. Note that because these users were sampled from the global  
7 timeline, they may not all be English speakers.

8 As in our main analysis, we applied the same hg index-based approach to  
9 measure user influence. However, because this dataset covers only a single day,  
10 the resulting hg index values are less fine-grained than our main dataset, which  
11 spans 31 days of Japanese posts. Consequently, we classified users into four  
12 categories (low, mid, high, and very high) rather than six.

13 Furthermore, owing to the limited temporal coverage (24 hours), we analyzed  
14 the cascading repost probability (CRP) in shorter time windows (30 minutes, 1  
15 hour, and 3 hours). Although the observation period is more constrained than  
16 our main analysis, we observe similar trends: users in the very high influence  
17 group consistently achieve higher CRP. We also note that some typically influ-  
18 ential users may be underrepresented or misclassified due to the brief window.  
19 Therefore, we should interpret these results as a supplemental check rather than  
20 a comprehensive analysis of long-term user behavior and diffusion dynamics.

## 21 S2 Topics of User Profiles

22 User profiles used for the regression analysis were tokenized using the Japanese  
23 tokenizer Mecab [2], splitting the text into word-level tokens. As preprocessing,  
24 we removed stop words, function words, URLs, and mentions. After this, we  
25 applied **Bitern Topic Modeling (BTM)**[4], which is particularly well suited  
26 for short texts. For simplicity, we set the number of topics to 10. Table S1  
27 provides an overview of these 10 topics, including example Japanese keywords  
28 and their approximate English translations for reference.

Table S1: Overview of 10 Topics of User’s Profiles with Example Keywords (Japanese). English keywords in parentheses are provided for reference.

| Topic | Label                            | Example Keywords (JP / EN)                                                                       |
|-------|----------------------------------|--------------------------------------------------------------------------------------------------|
| 1     | Fandoms of Male Artists          | ハート(heart), 応援(support), ファン(fan), SMAP (artist name), 嵐(Arashi / artist name)                   |
| 2     | Raffles and Others               | 懸賞(raffle), 当選(winner), 旅行(travel), 猫(cat), コスメ(cosmetics)                                       |
| 3     | English Phrases                  | I, AND, of, TO, IS                                                                               |
| 4     | Gaming and Anime Fandoms         | ウマ娘(Uma Musume / game title), FGO (game title), アイコン(icon), 描く(draw), ポケモン(Pokemon / game title) |
| 5     | Political Views and Opinions     | 日本(Japan), 反対(oppose), 政治(politics), 自分(self), コロナ(COVID-19)                                     |
| 6     | Fandoms For Female Content       | 腐る(decay), FGO (Game), 夢(dream), ツイステッドワンダーランド(Twisted Wonderland / game title), 腐女子(fujoshi)    |
| 7     | Bussines Use                     | DM (direct mail), 情報(information), 依頼(request), お仕事(job), イベント(event)                            |
| 8     | Sports and Entertainment Fandoms | 野球(baseball), サッカー(soccer), 音楽(music), ライブ(live), 乃木坂46 (Nogizaka46 / artist name)               |
| 9     | Drawing Community                | 描く(draw), 絵(picture), アイコン(icon), ツイート(tweet), イラスト(illustration)                                |
| 10    | Miscellaneous                    | 趣味(hobby), 音楽(music), 映画(movie), 写真(photography), 漫画(manga)                                      |

### 29 S3 Topic Analysis on Random Effects

30 This section describes the random effects of the mixed-effects model in subsection  
 31 2.4, mainly focusing on posts. Additionally, we provide an analysis of the  
 32 topics of these posts.

33 In our main analysis, we fitted a mixed-effects model using the `lme4`[1] pack-  
 34 age in R, specifying random intercepts for both `source_tweet_id` and `user_topic`.  
 35 Table S2 summarizes the random effects that Table 2 in the main analysis.  
 36 The standard deviation for `source_tweet_id` (0.7733) is higher than that for  
 37 `user_topic` (0.4321). This indicates that each tweet captured by `source_tweet_id`  
 38 contributes more to whether a post reposts than differences among user topics.  
 39 Notably, the standard deviation of `source_tweet_id` is larger than the coeffi-  
 40 cients of `sender_influence` for *very high* users.

Table S2: Random effects from the mixed-effects model.

| Groups                       | Name        | Variance | Std.Dev. |
|------------------------------|-------------|----------|----------|
| <code>source_tweet_id</code> | (Intercept) | 0.5980   | 0.7733   |
| <code>user_topic</code>      | (Intercept) | 0.1868   | 0.4321   |

41 To explore whether topical differences might explain the sizeable post-level  
 42 variation, we applied the same model (BTM) for the topics of user profiles to the  
 43 dataset of source tweets. We tested 10, 15, and 30 topics, and the 10-topic model  
 44 yielded the highest coherence. Table S3 provides an overview of these 10 topics,  
 45 including example Japanese keywords and approximate English translations for  
 46 reference.

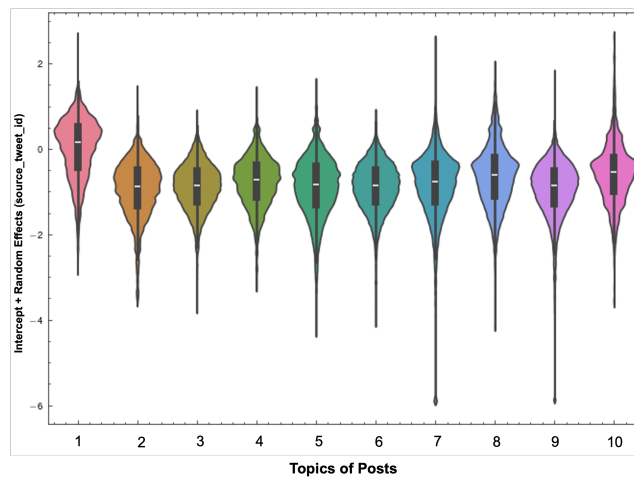

Figure S1: Sample visualization of intercept + random effects for each topic.

Table S3: Overview of 10 Topics of Posts with Example Keywords (Japanese). English keywords in parentheses are provided for reference.

| Topic | Label                                     | Example Keywords (JP / EN)                                              |
|-------|-------------------------------------------|-------------------------------------------------------------------------|
| 1     | Promotional Campaigns & Giveaways         | プレゼント(present), フォロー(follow), キャンペーン(campaign)                          |
| 2     | Miscellaneous Daily Life                  | 猫(cat), 犬(dog), 食べる(eat), 地震(earthquake), 水(water)                      |
| 3     | Political / Election-Related              | 選挙(election), 投票(vote), 政党(political party), 政権交代(change of government) |
| 4     | Sports Events (Baseball, Soccer, etc.)    | 選手(player), 試合(match), 優勝(victory), チーム(team)                           |
| 5     | Creative Works, Illustrations, Gaming     | イラスト(illustration), ゲーム(game), デザイン(design), 描く(draw)                   |
| 6     | COVID-19 and Government Policy            | ワクチン(vaccine), 接種(inoculation), コロナ(COVID-19), 政府(government)           |
| 7     | Positive Emotions and Festive Themes      | 笑顔(smile), ハロウィン(Halloween), 嬉しい(happy), 誕生日(birthday)                  |
| 8     | Media, Broadcasting, and Streaming        | 配信(streaming), 放送(broadcast), 映画(movie), 動画(video)                      |
| 9     | General Opinions and Everyday Reflections | 思う(think), 言う(say), 自分(myself), 見る(see)                                 |
| 10    | Event Announcements and Ticketing         | 開催(holding an event), チケット(ticket), 予約(reservation), 会場(venue)          |

47 Figure S1 shows the model’s intercept plus its random effect for each `source_tweet_id`,  
 48 illustrating whether these distributions differ substantially by topic. In short, no  
 49 topic stands out as having an especially high or low average repost likelihood.  
 50 This suggests that, while the unique content of each post strongly influences  
 51 its chances of being reposted, it is not simply a matter of belonging to one of  
 52 the 10 broad topics. Consequently, factors such as emotional valence, writing  
 53 style, timing, or visual elements may play larger roles in driving repost behavior.  
 54 These considerations remain open areas for future investigation.

## 55 S4 Analysis of Influencers’ Reposting Behavior

56 To further investigate the cause of influencers’ high share in the secondary  
 57 spread, we analyzed users’ reposting behavior by aggregating the number of  
 58 reposts for each user and visualizing the proportion of reposts accounted for by  
 59 top-reposted users (Figure S2).

60 Figure S2(a) reveals that the top 1% of reposted users account for 30% of  
 61 all reposts, whereas the top 20% account for 80%. Importantly, these top-  
 62 reposted users comprise users with various levels of influence. The Complemen-  
 63 tary Cumulative Distribution Function (CCDF) in Figure S2(b) demonstrates  
 64 that while the majority of users make very few reposts, a small number of users  
 65 make a disproportionately large number of reposts.

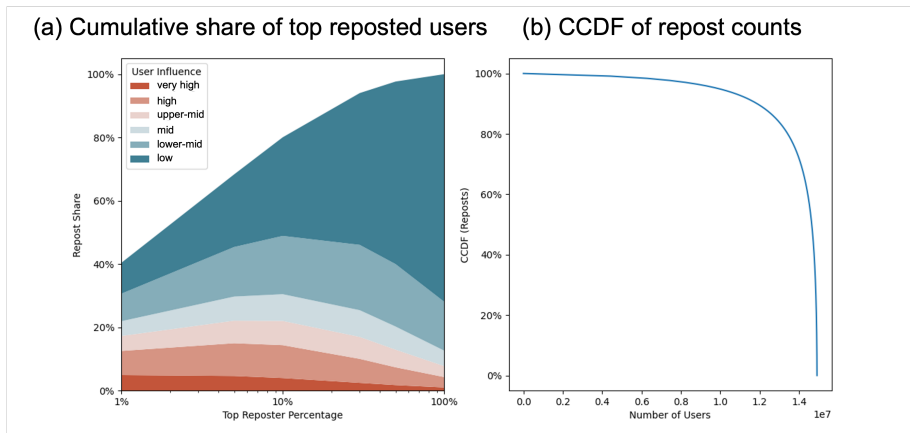

Figure S2: Analysis of users’ reposting behavior. (a) Cumulative share of top reposted users. (b) CCDF of repost counts.

66 These findings suggest that the high share of influencers in the secondary  
 67 spread is not merely due to their higher frequency of reposting. This result  
 68 indicates that the influence category significantly affects the information distri-  
 69 bution efficiency in the secondary spread. Information reposted by influencers  
 70 tends to reach a wider audience and is more likely to be reposted than informa-  
 71 tion shared by other user groups, which is consistent with prestige bias.

72 Additionally, the results show a substantial skew in the number of reposts  
 73 among users. Therefore, a little of users spread the most of reposts, indicat-  
 74 ing potential bottlenecks in information diffusion and the risks of excessively  
 75 spreading certain information. These results and our main results demonstrate  
 76 that influencers’ high share in the secondary spread is attributed to the quali-  
 77 tative aspects of their influence rather than simply a higher volume of reposts.  
 78 This analysis highlights the issue of skewed information diffusion as a new area  
 79 for future research.

## 80 S5 Sensitivity Analysis Within 30 Minutes of 81 Posting

82 Although our primary analyses used a virtual timeline constructed in a near-  
 83 chronological manner, we acknowledge that X (formerly Twitter) provides algo-  
 84 rithmic recommendations such as trending topics, which can reorder or highlight  
 85 posts in ways that deviate from strict chronological sequence. To reduce these  
 86 algorithmic effects, we limit our analysis to the first 30 minutes after a post’s  
 87 publication. Trending or recommended content typically relies on accumulating  
 88 engagement signals over a longer timeframe.

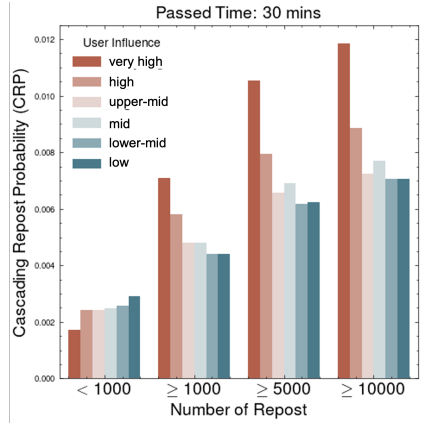

Figure S3: Cascading Repost Probability (CRP) within 30 minutes of the original post, broken down by user influence categories and post popularity thresholds.

89 Figure S3 shows that even in this shorter timeframe—where the influence of  
 90 algorithmic ordering may be relatively limited—the observed trends in repost  
 91 behavior remain consistent with our main findings. Specifically, higher influence  
 92 users continue to exhibit relatively higher CRP values for popular posts (e.g.,  
 93  $\geq 1000$  reposts), suggesting that the prestige bias effect is robust under these  
 94 near-chronological conditions.

95 We note, however, that some algorithmic prioritization could still occur  
96 within these initial 30 minutes. Nevertheless, the consistency of these results  
97 supports the view that our near-chronological virtual timeline reasonably ap-  
98 proximates user exposure patterns, capturing meaningful insights about infor-  
99 mation diffusion and user influence in the early stages of reposting.

## 100 References

- 101 [1] Douglas Bates, Martin Mächler, Ben Bolker, and Steve Walker. Fitting  
102 linear mixed-effects models using lme4. *Journal of Statistical Software*, 67  
103 (1), 2015. ISSN 1548-7660. doi: 10.18637/jss.v067.i01. URL [http://dx.  
104 doi.org/10.18637/jss.v067.i01](http://dx.doi.org/10.18637/jss.v067.i01).
- 105 [2] Taku Kudo. Mecab : Yet another part-of-speech and morphological analyzer.  
106 <http://mecab.sourceforge.net/>, 2005. URL [https://cir.nii.ac.jp/crid/  
107 1572543025344508032](https://cir.nii.ac.jp/crid/1572543025344508032).
- 108 [3] Yuto Yamaguchi, Mitsuo Yoshida, Christos Faloutsos, and Hiroyuki Kita-  
109 gawa. Patterns in interactive tagging networks. *Proceedings of the Inter-  
110 national AAAI Conference on Web and Social Media*, 9(1):513–522, Au-  
111 gust 2015. ISSN 2162-3449. doi: 10.1609/icwsm.v9i1.14616. URL [http:  
112 //dx.doi.org/10.1609/icwsm.v9i1.14616](http://dx.doi.org/10.1609/icwsm.v9i1.14616).
- 113 [4] Xiaohui Yan, Jiafeng Guo, Yanyan Lan, and Xueqi Cheng. A biterm topic  
114 model for short texts. In *Proceedings of the 22nd international conference  
115 on World Wide Web, WWW '13*, page 1445–1456. ACM, May 2013. doi:  
116 10.1145/2488388.2488514. URL [http://dx.doi.org/10.1145/2488388.  
117 2488514](http://dx.doi.org/10.1145/2488388.2488514).
